# Supplementary material for: Bipolar fluorinated covalent triazine framework cathode with high lithium storage and long cycling capability
Source: Royal Society of Chemistry journal article supplement (doi:10.1039/d2ra01582j), 2022-01-01
Supplement: d2ra01582j1.pdf [file d2ra01582j1.pdf]

## Supporting Information

### **Bipolar fluorinated covalent triazine frameworks cathode with high lithium storage and long cycling capability**

Xiudong Chen\*, Hang Zhang, Ping Yan, Bo Liu\*, Xiaohua Cao, Changchao Zhan, Yawei Wang, and Jin-Hang Liu\*

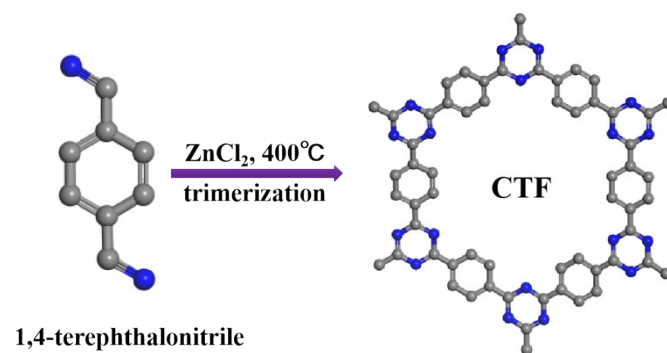

**Fig. S1.** The synthesis of CTF.

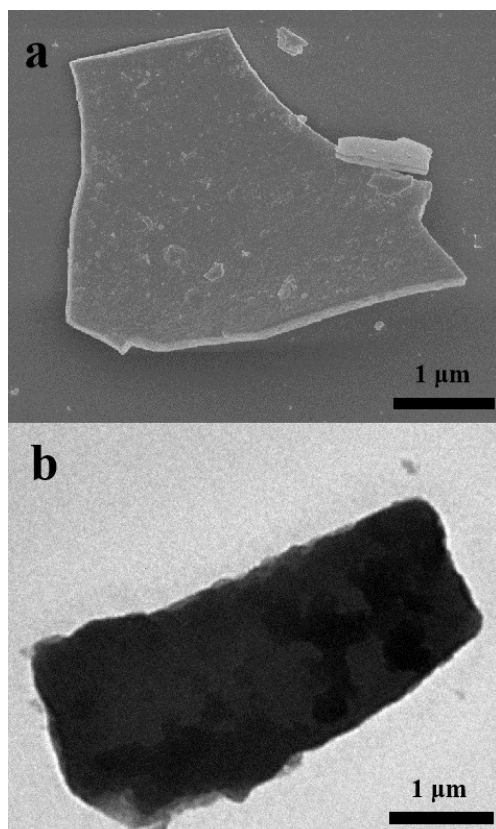

**Fig. S2.** (a) SEM image and (b) TEM image of FCTF.

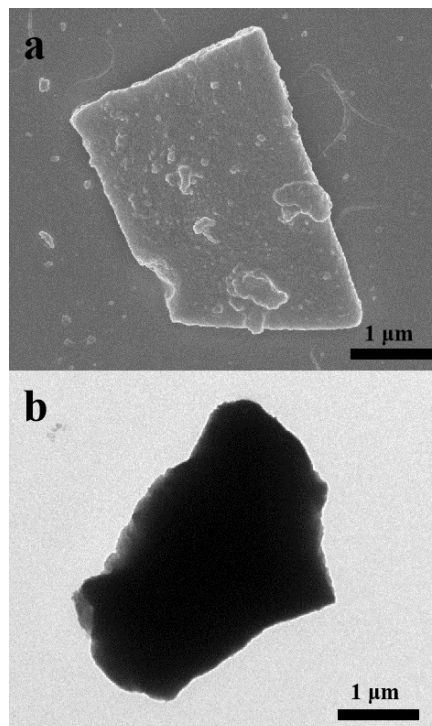

**Fig. S3.** (a) SEM image and (b) TEM image of CTF.

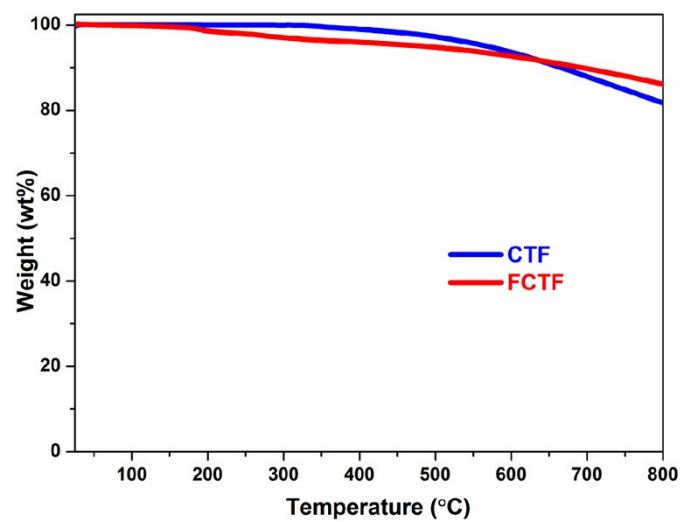

**Fig. S4.** TGA curve of the FCTF and CTF at a heating rate of 8 °C/min under nitrogen atmosphere.

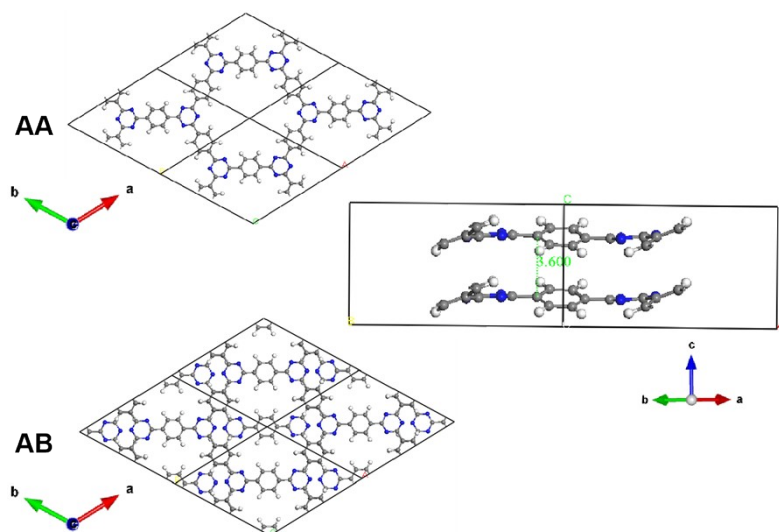

Fig. S5. AA stacking and AB stacking patterns of CTF.

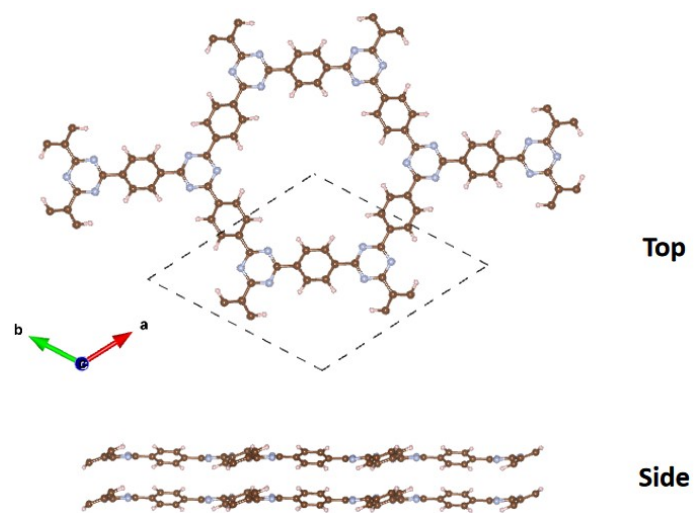

**Fig. S6.** Top and side views of the AA-stacked bilayer CTF.

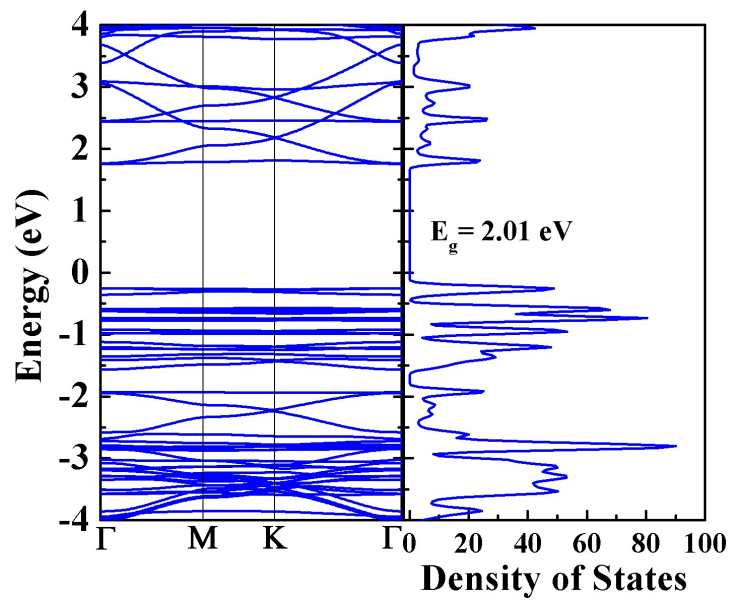

Fig. S7. The band structure and density of states plot of the bilayer CTF.



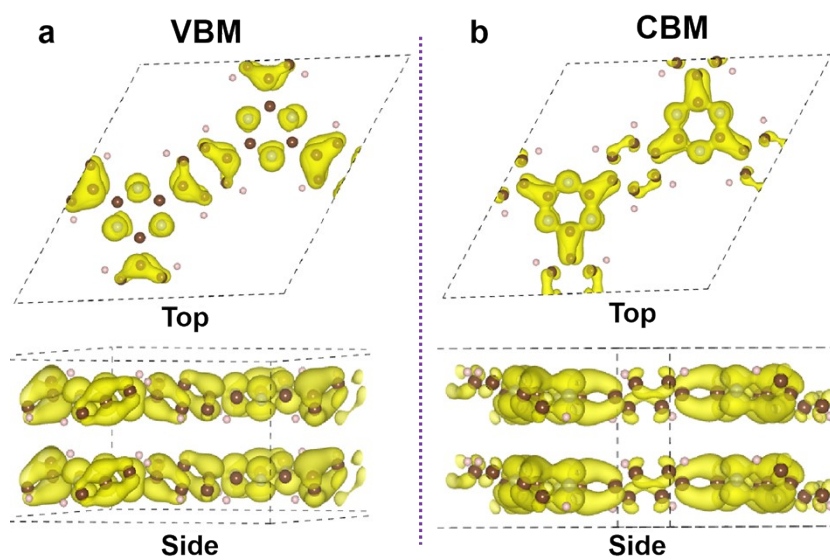

**Fig. S8.** The top and side views of the charge density plot of the (c) CBM and (d) VBM states of the bilayer CTF.

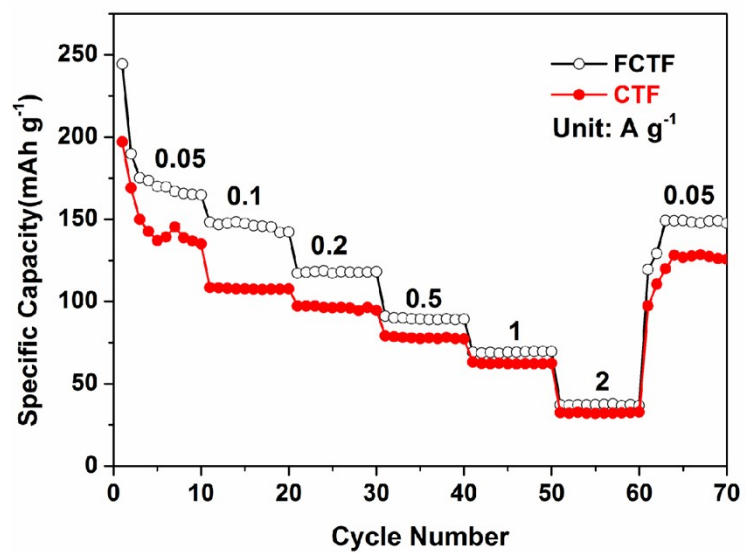

Fig. S9. Rate capability of FCTF and CTF.
